# Supplementary material for: 25-Hydroxycholesterol modulates microglial function and exacerbates Alzheimer’s disease pathology: mechanistic insights and therapeutic potential of cholesterol esterification inhibition
Source: Springer Nature journal article supplement (doi:10.1186/s12974-025-03357-y), 2025-02-25

Figure 2D

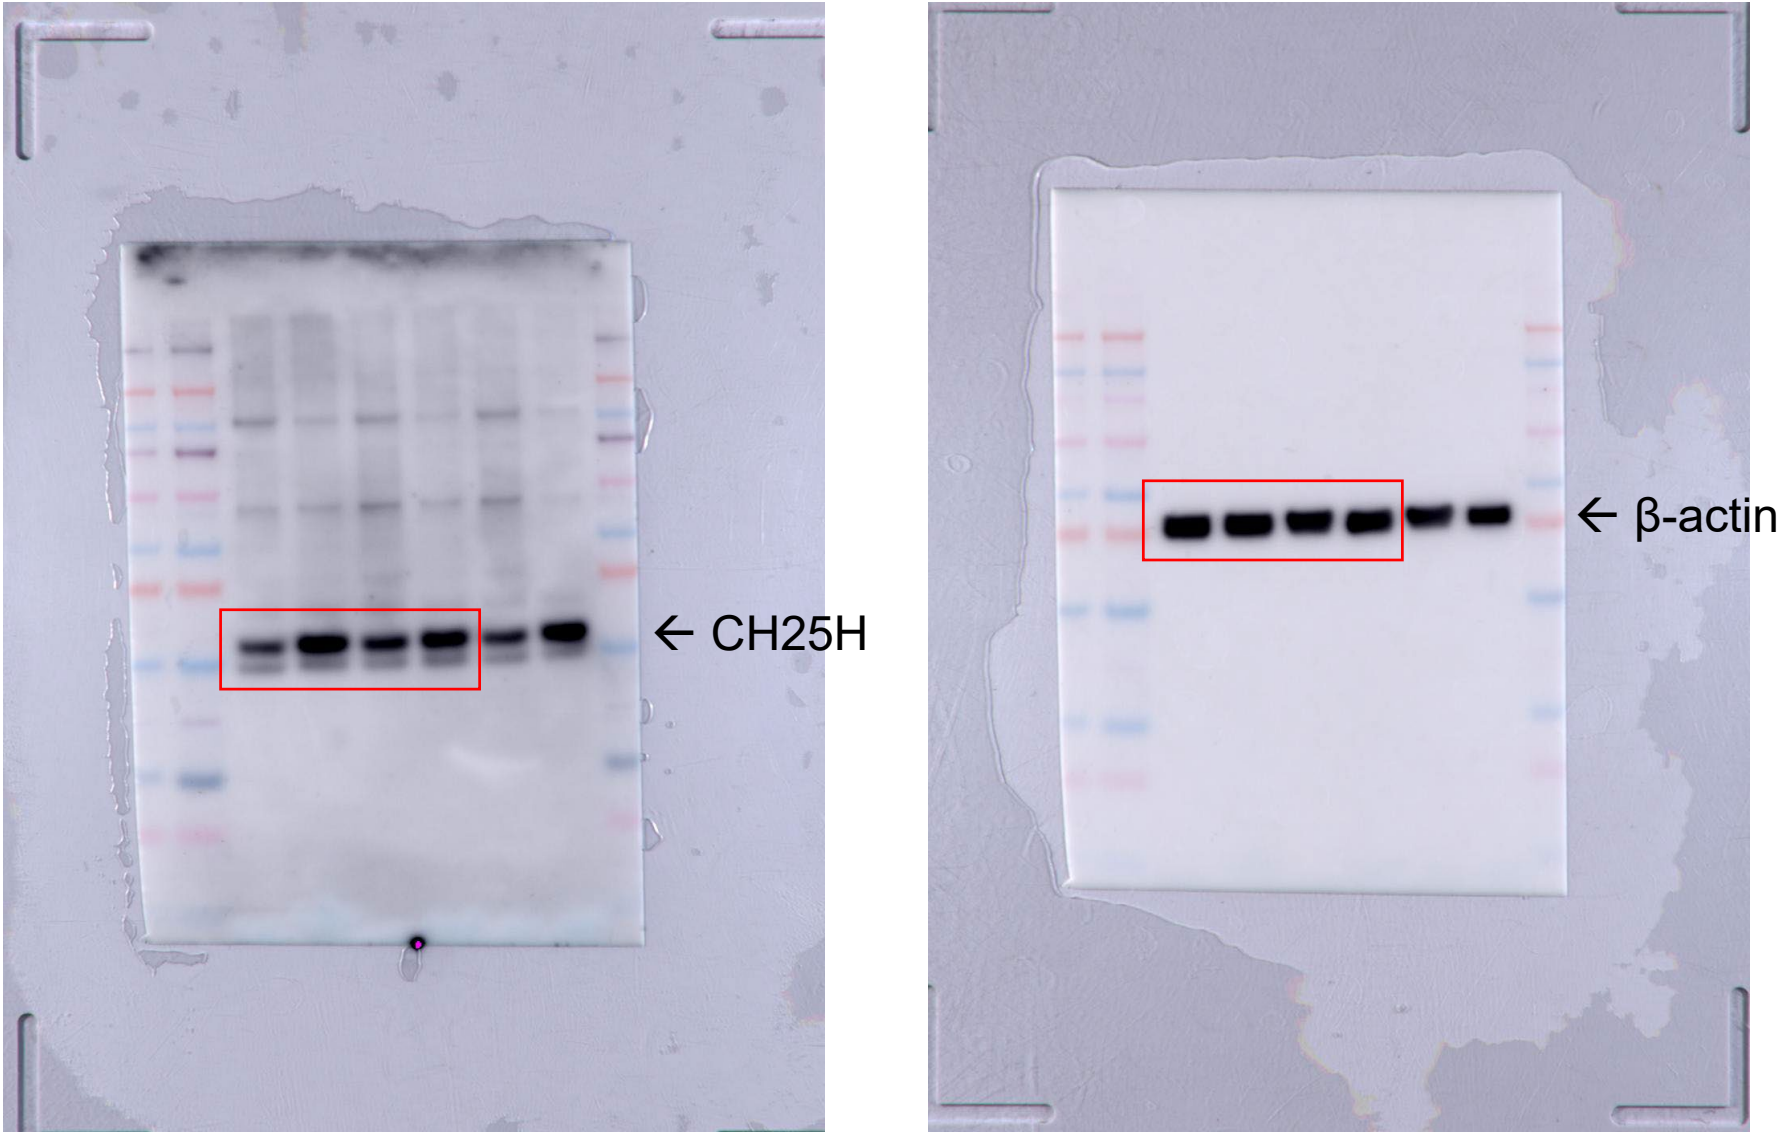

Extended Data Figure 2C

TNF- $\alpha$  →

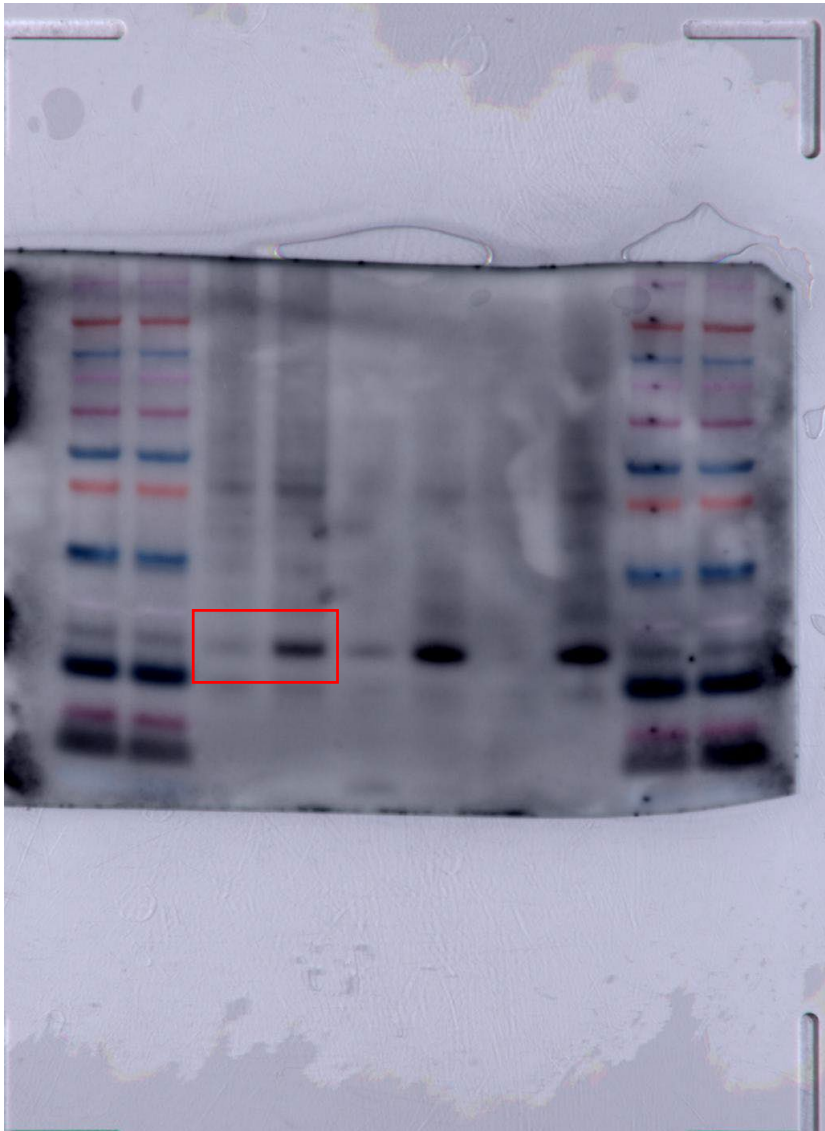

Extended Data Figure 2F

Pro IL-1 $\beta$  →

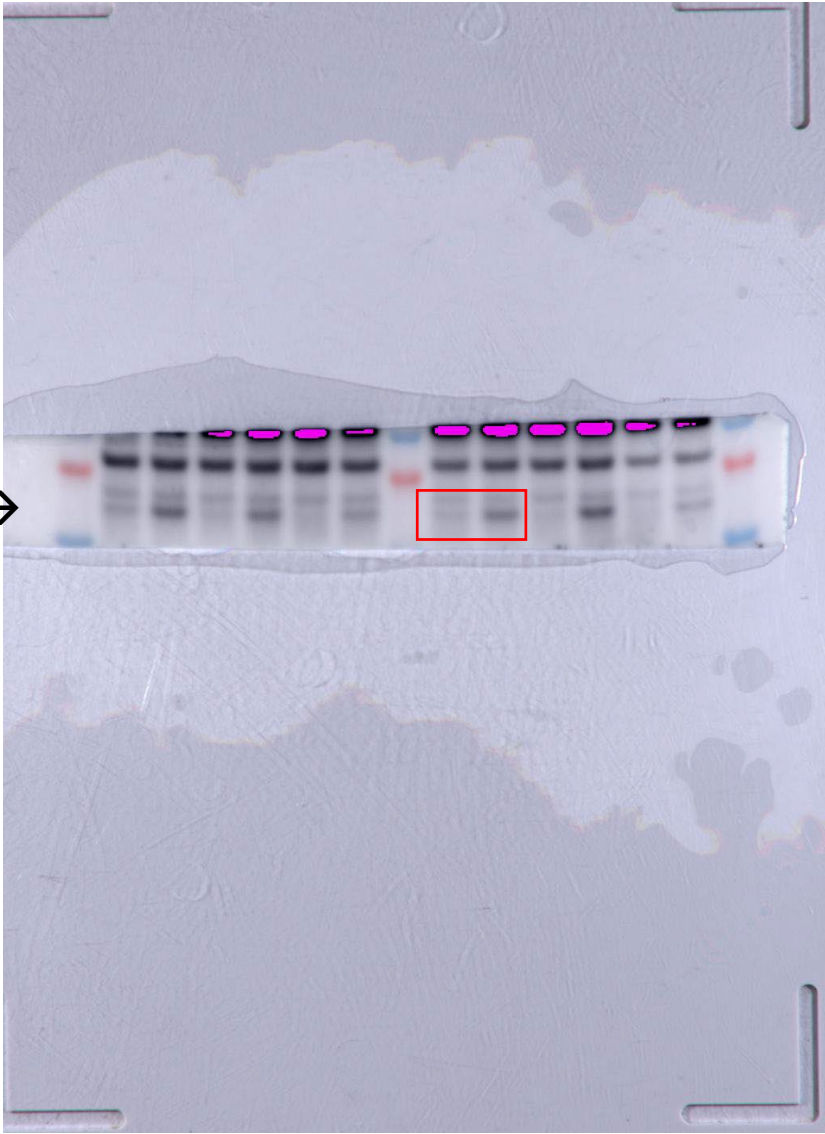

←  $\beta$ -actin

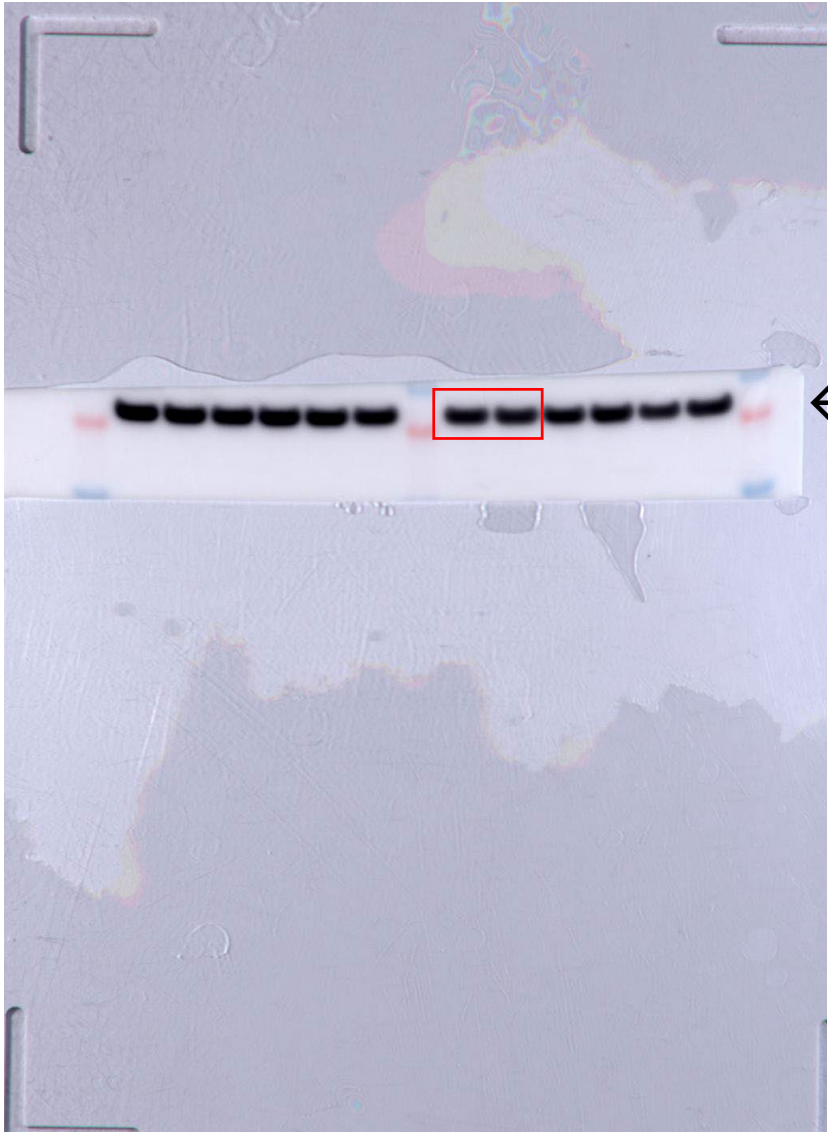

# Extended Data Figure 7A

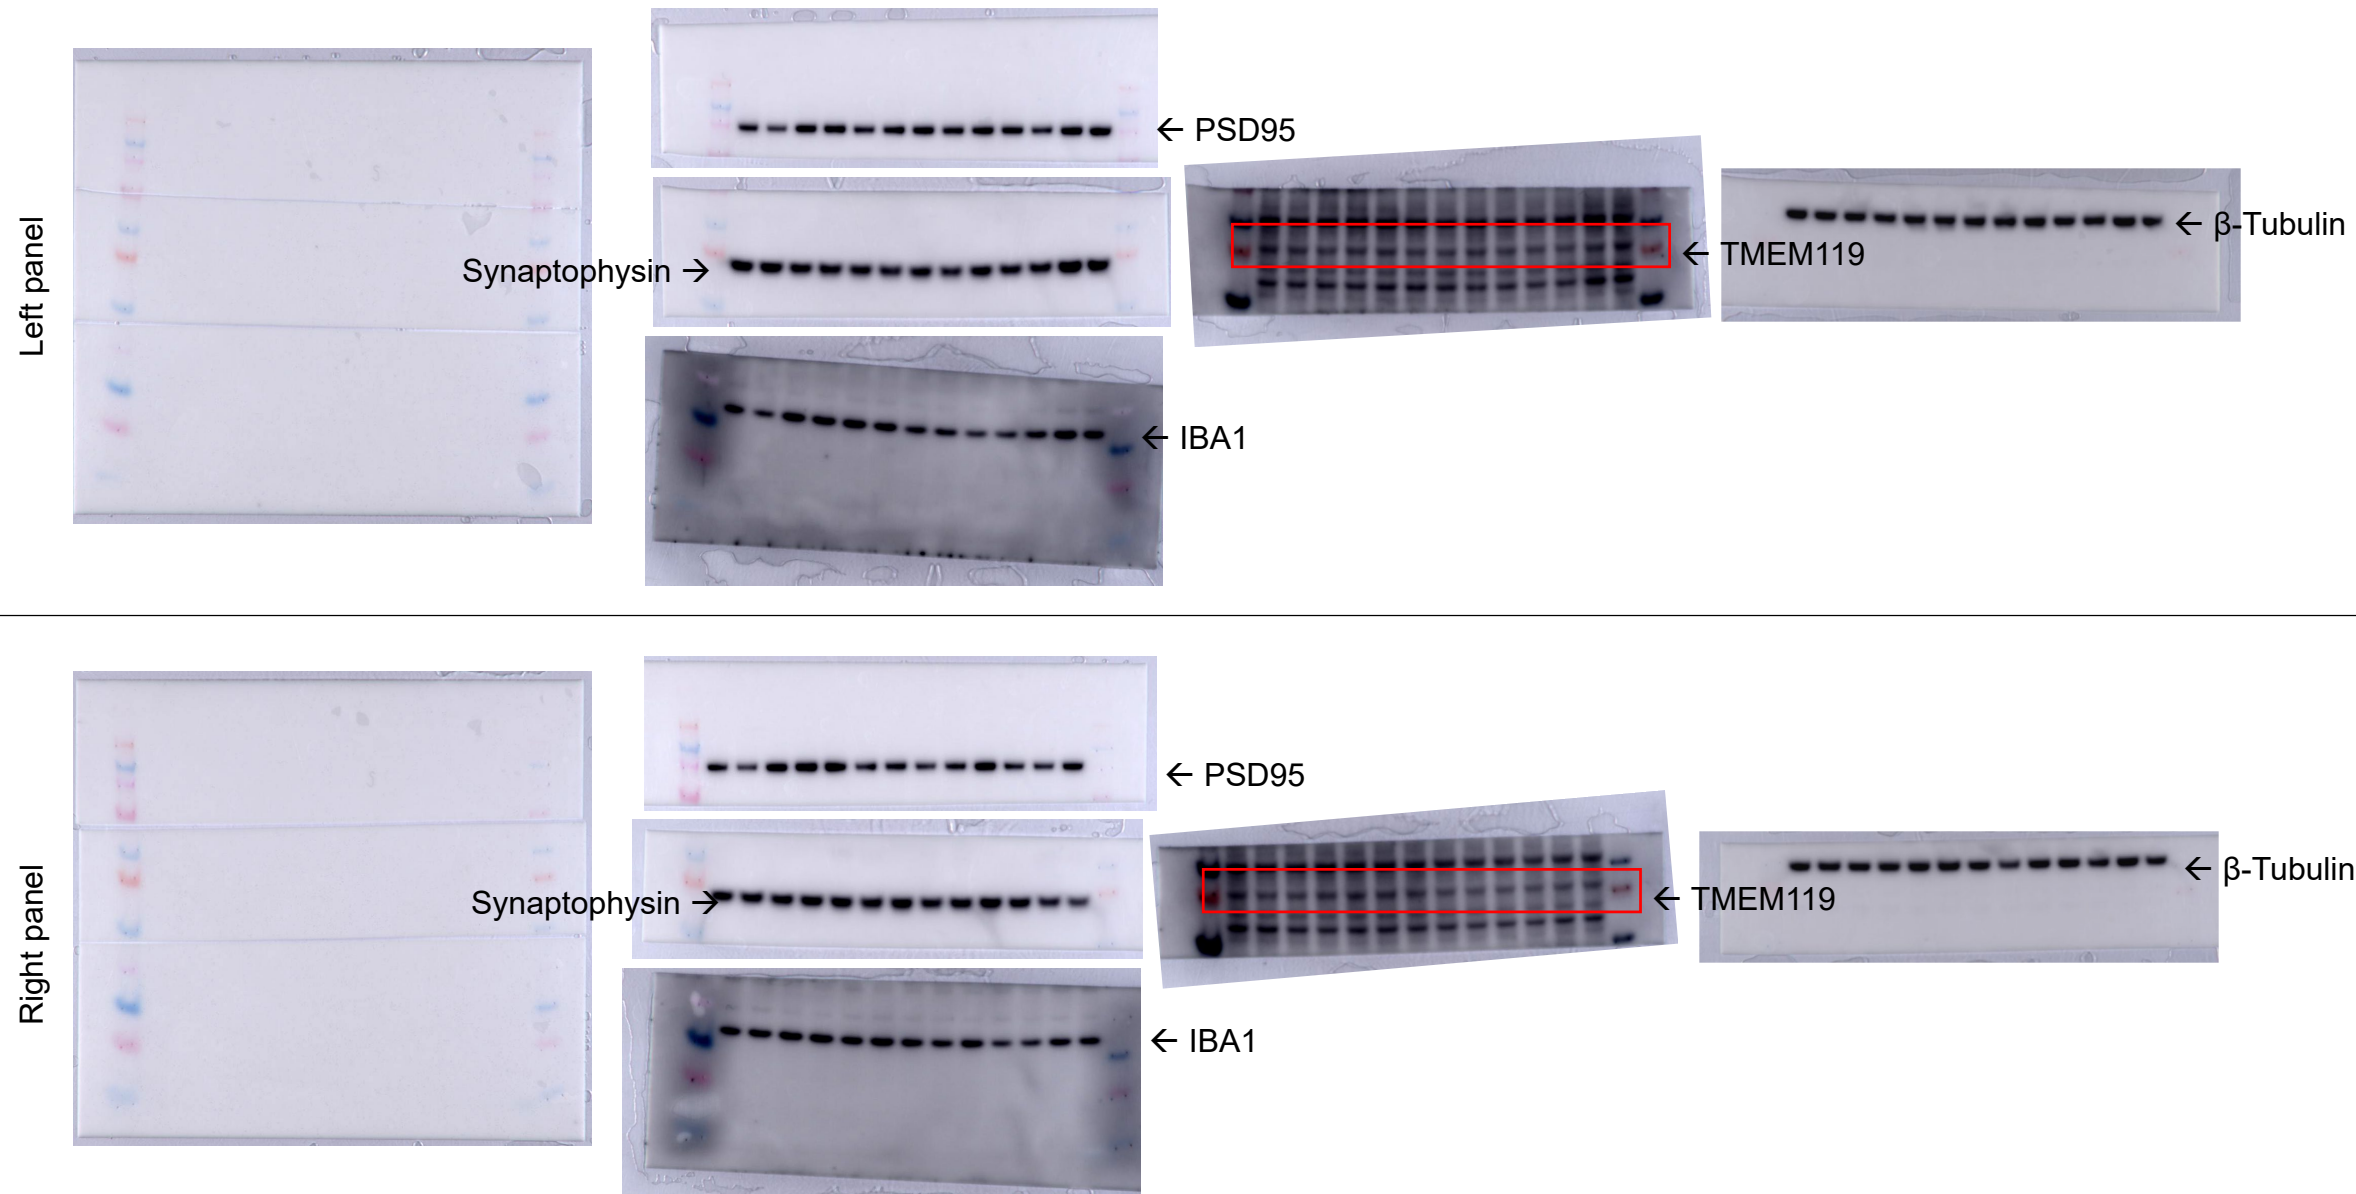

Supplement: MOESM4 [file 12974_2025_3357_MOESM4_ESM.pdf]
